# Supplementary material for: Nucleoporin 153 deficiency in adult neural stem cells defines a pathological protein-network signature and defective neurogenesis in a mouse model of AD
Source: PubMed Central journal article supplement (PMC11373261; doi:10.1186/s13287-024-03805-1), 2024-09-03

Data relative to figure 1: Gel showing the pattern of samples co-immunoprecipitated with Nup153 used in proteomic analysis

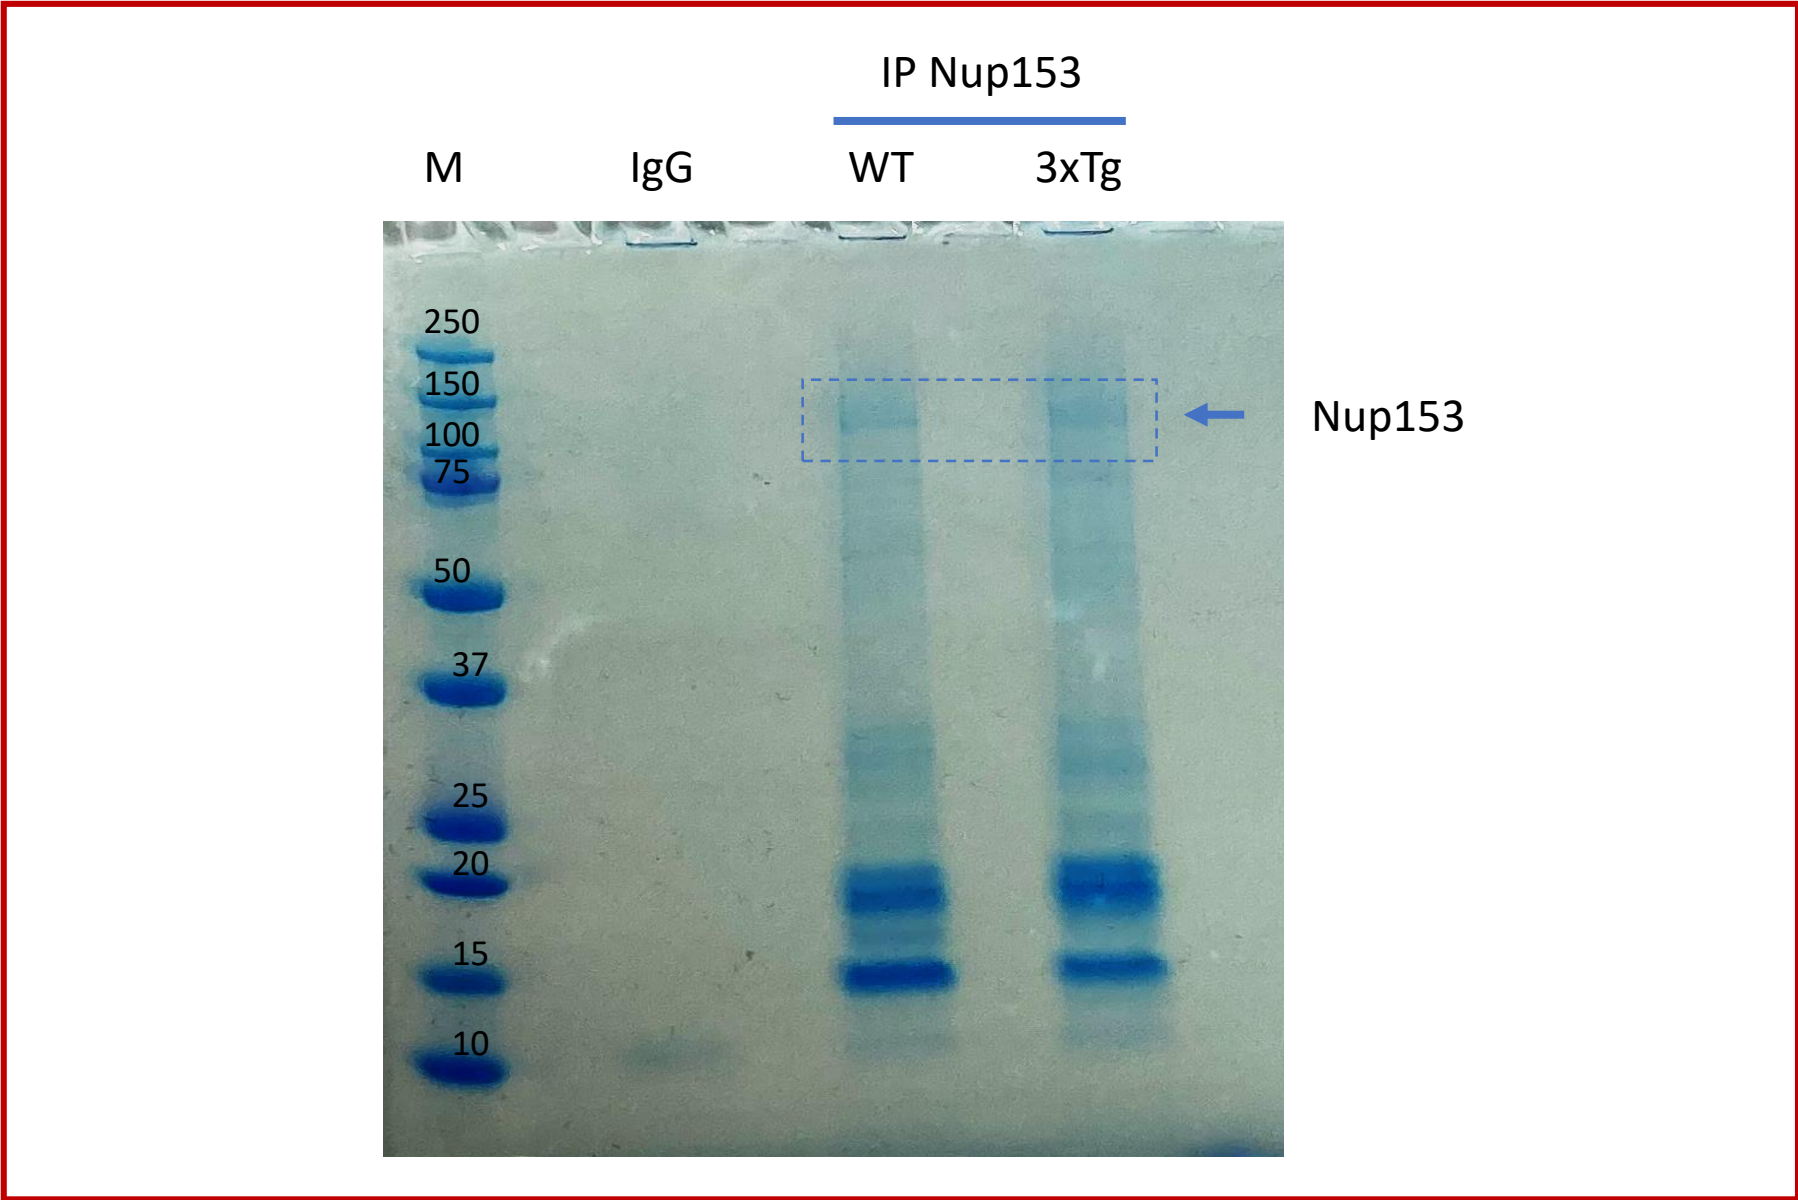

### Data relative to figure 5

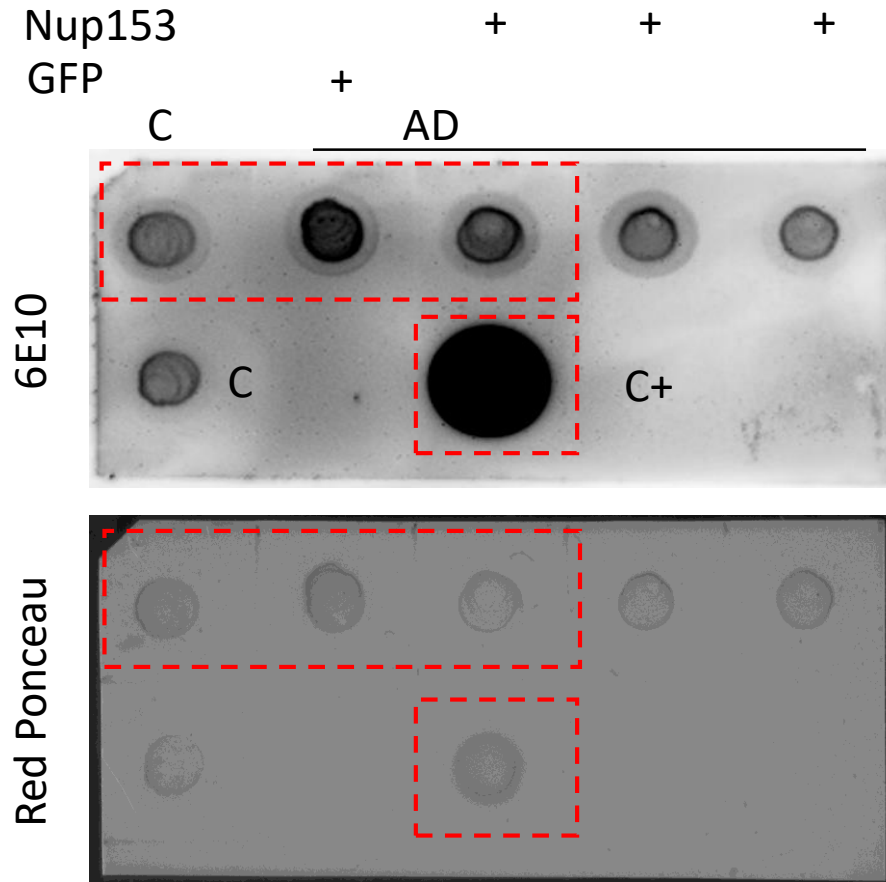

# Data relative to figure 6

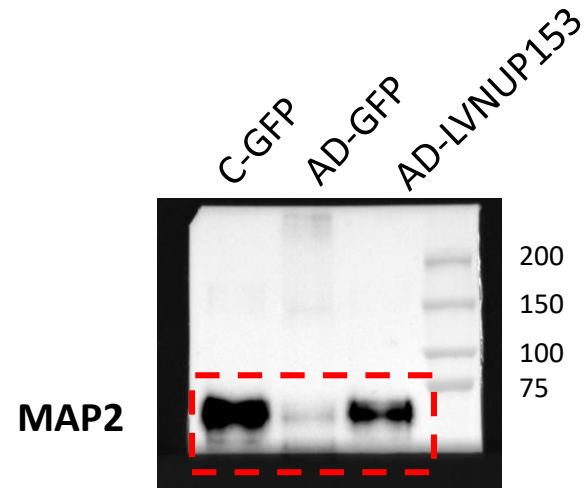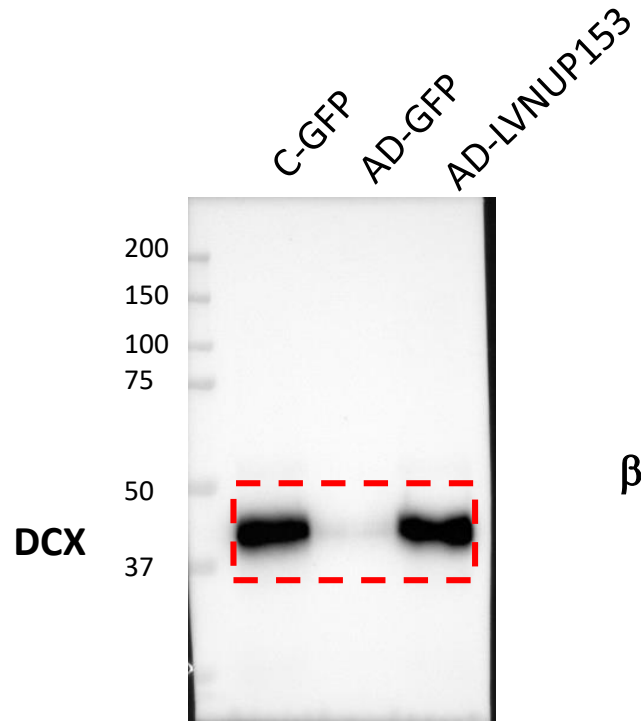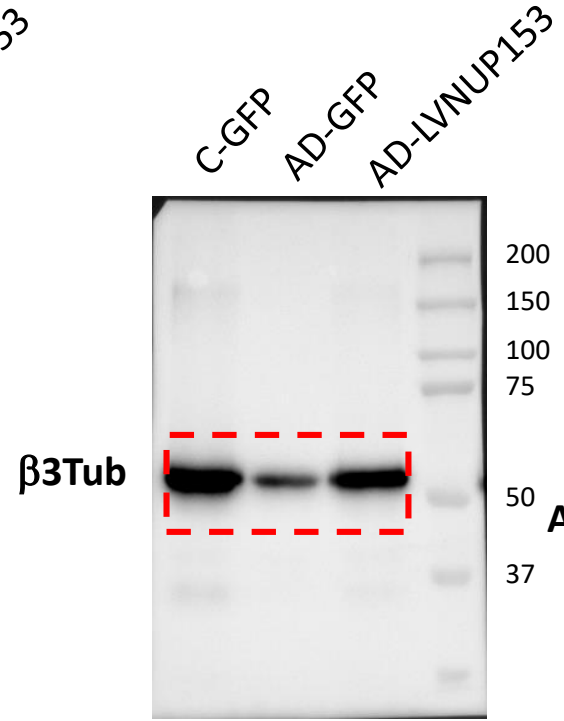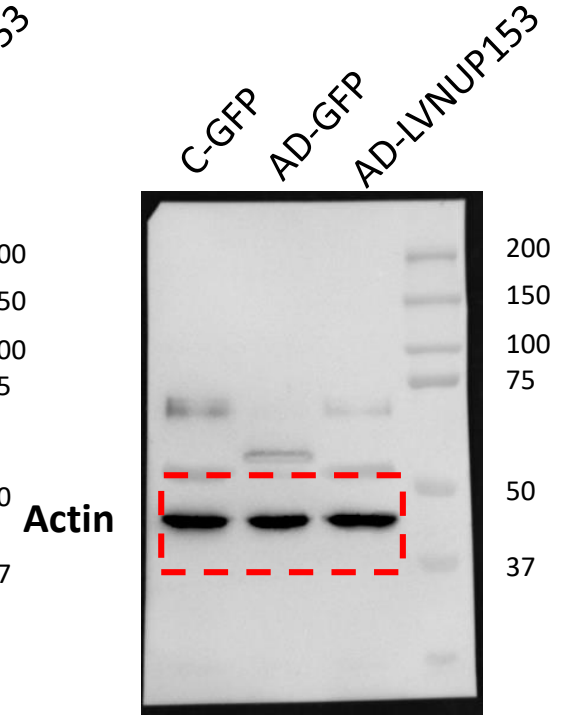

### Data relative to figure 6

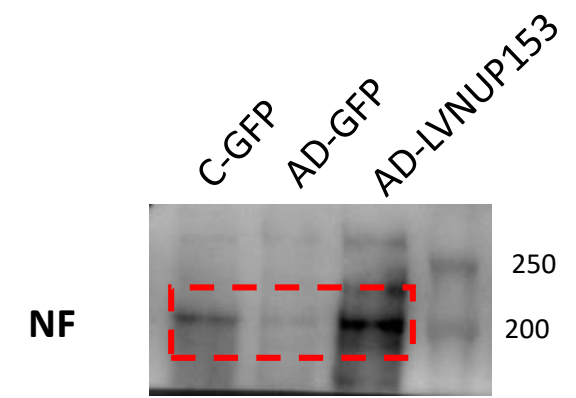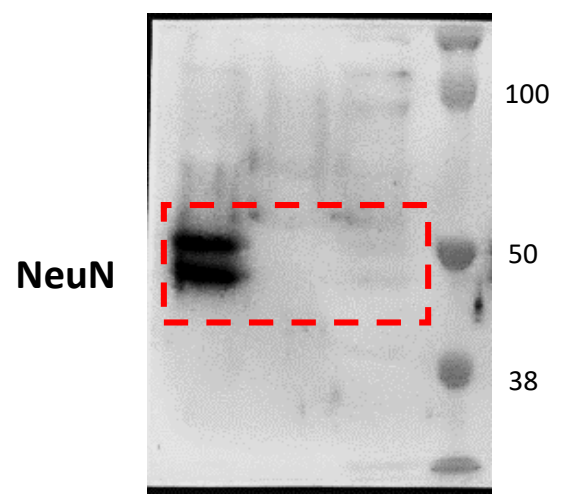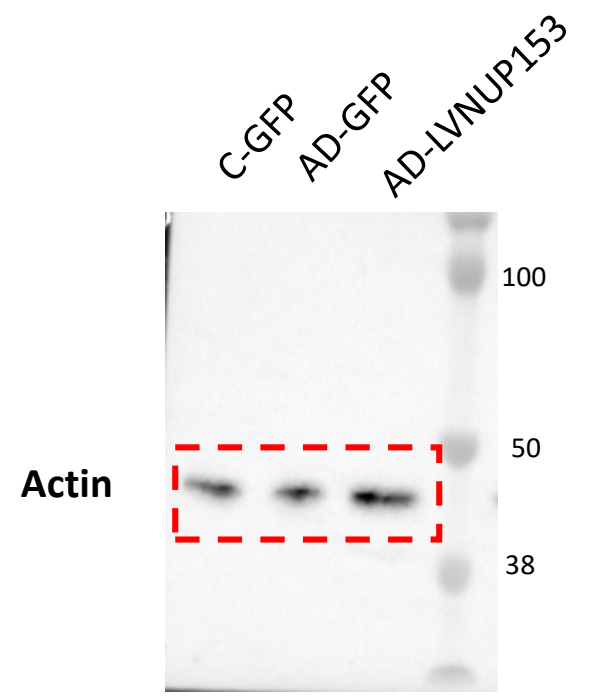

# Data relative to Supplemental figure 4

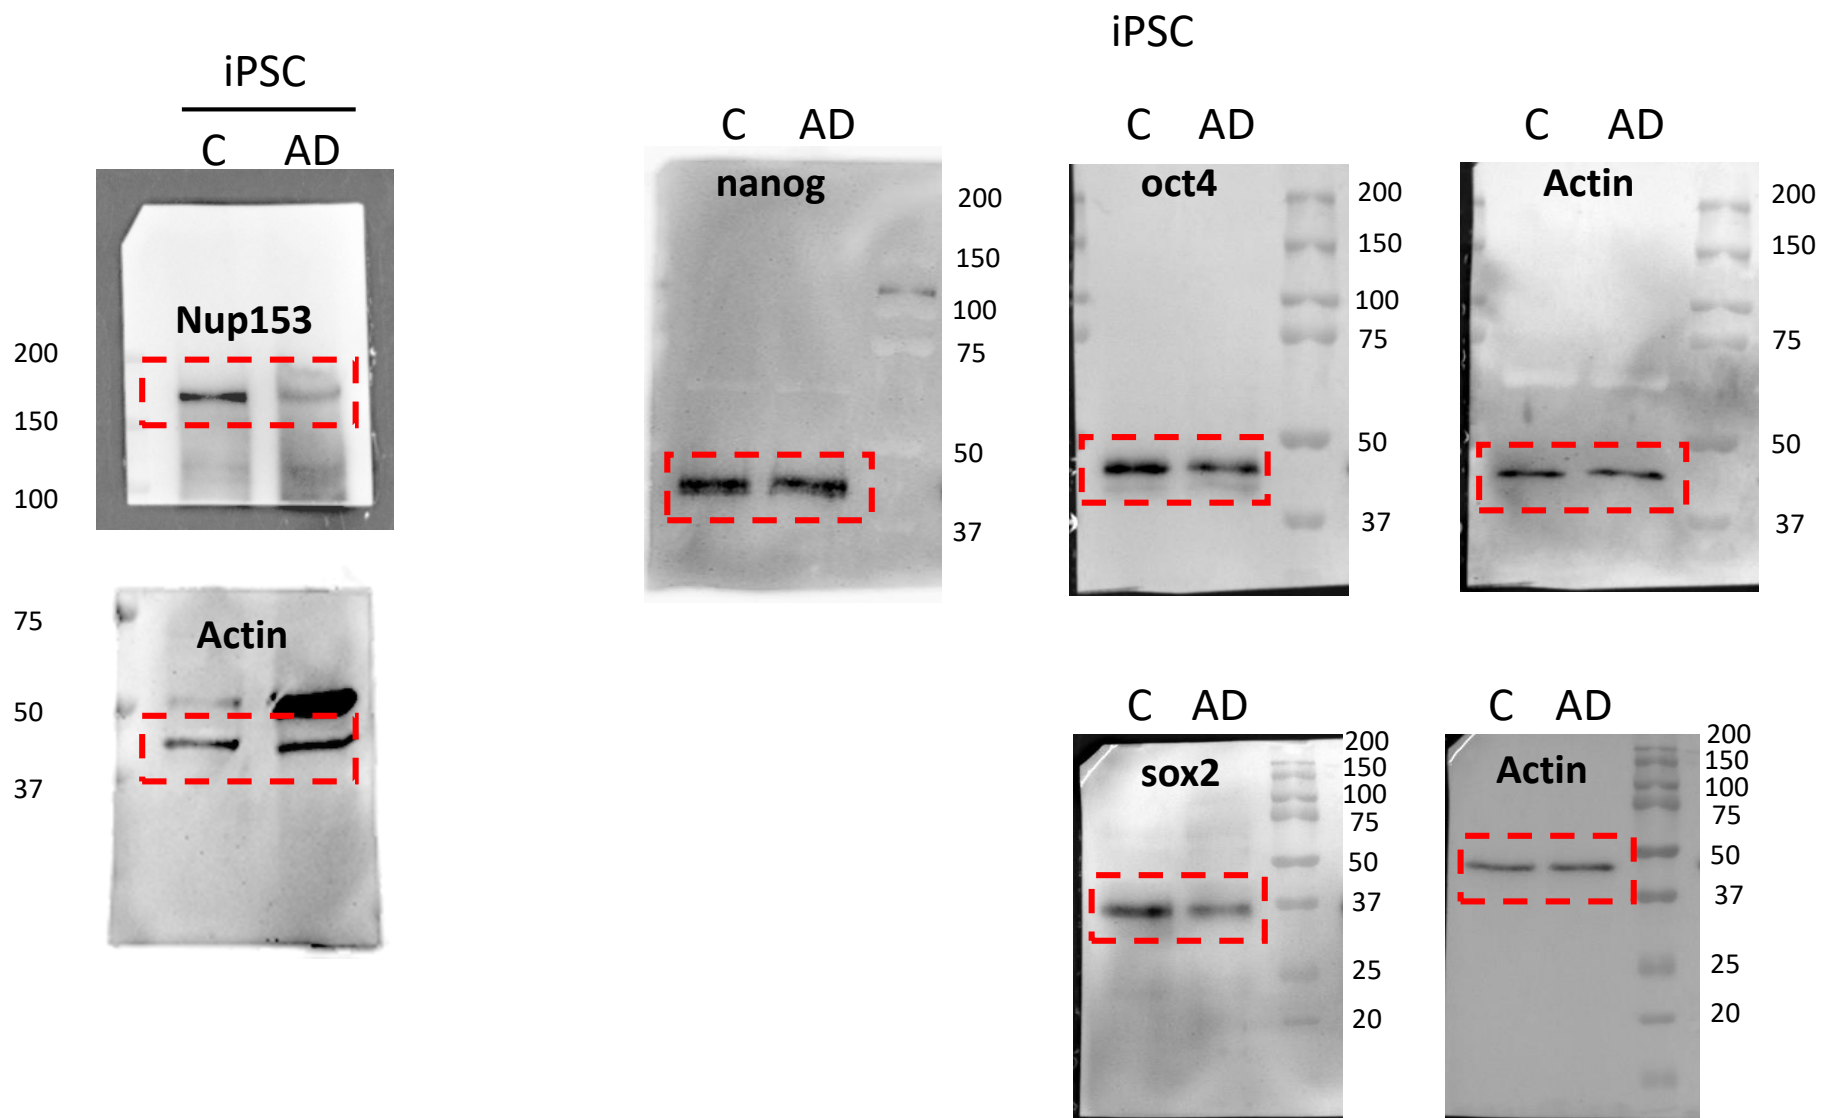

Data relative to Supplemental figure 5

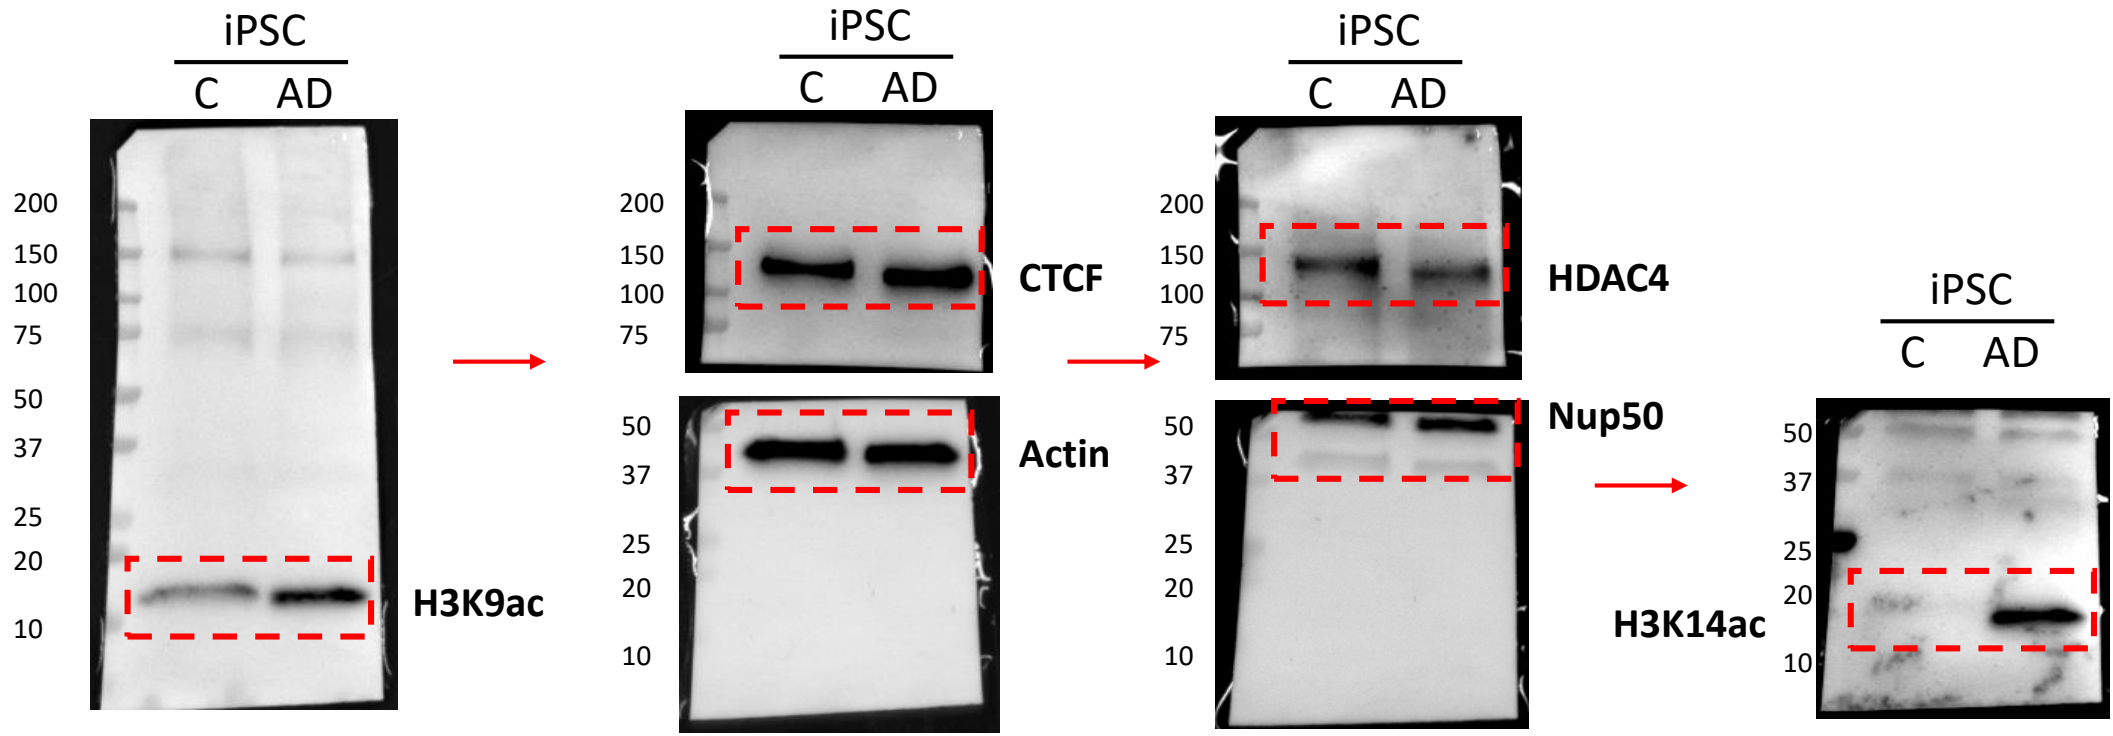

Data relative to Supplemental figure 5

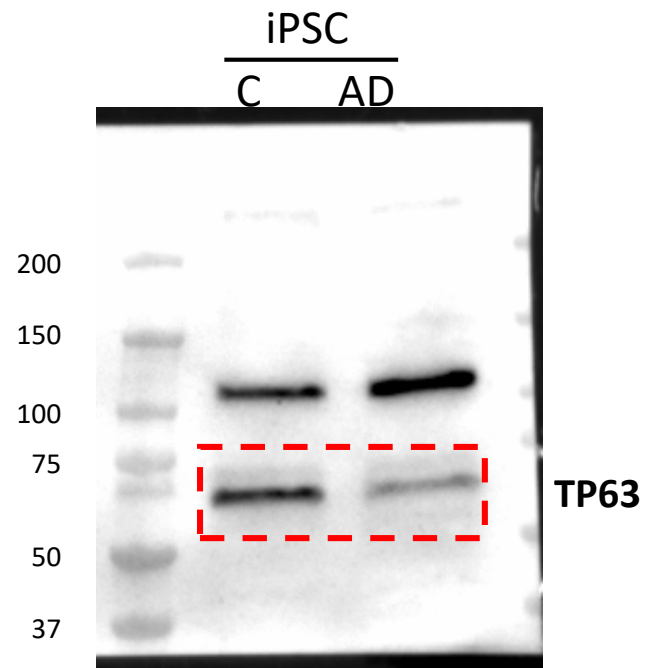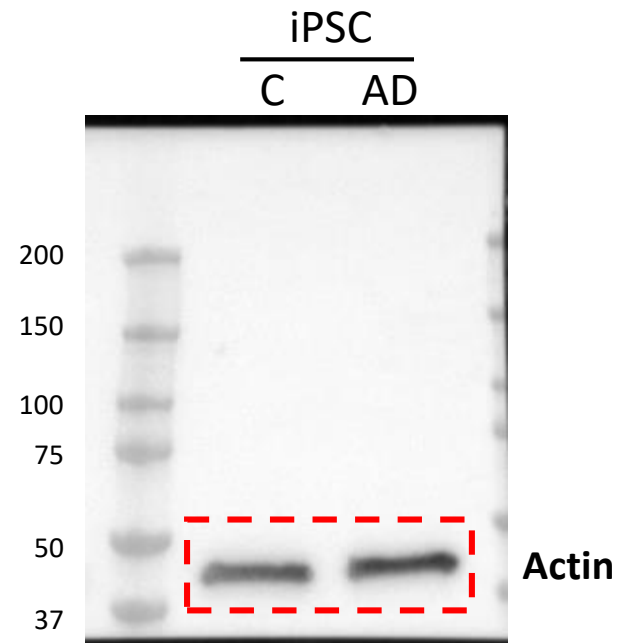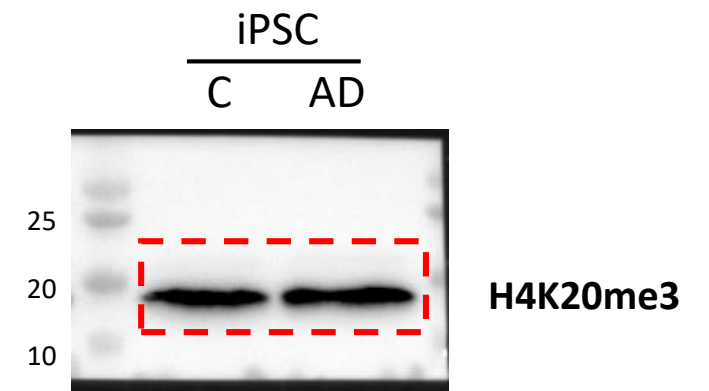

Supplement: 13287_2024_3805_MOESM8_ESM.pdf [file 13287_2024_3805_MOESM8_ESM.pdf]
