# Supplementary material for: Nucleoporin 153 deficiency in adult neural stem cells defines a pathological protein-network signature and defective neurogenesis in a mouse model of AD
Source: PubMed Central journal article supplement (PMC11373261; doi:10.1186/s13287-024-03805-1), 2024-09-03

**A**

**WT-specific GO BP**

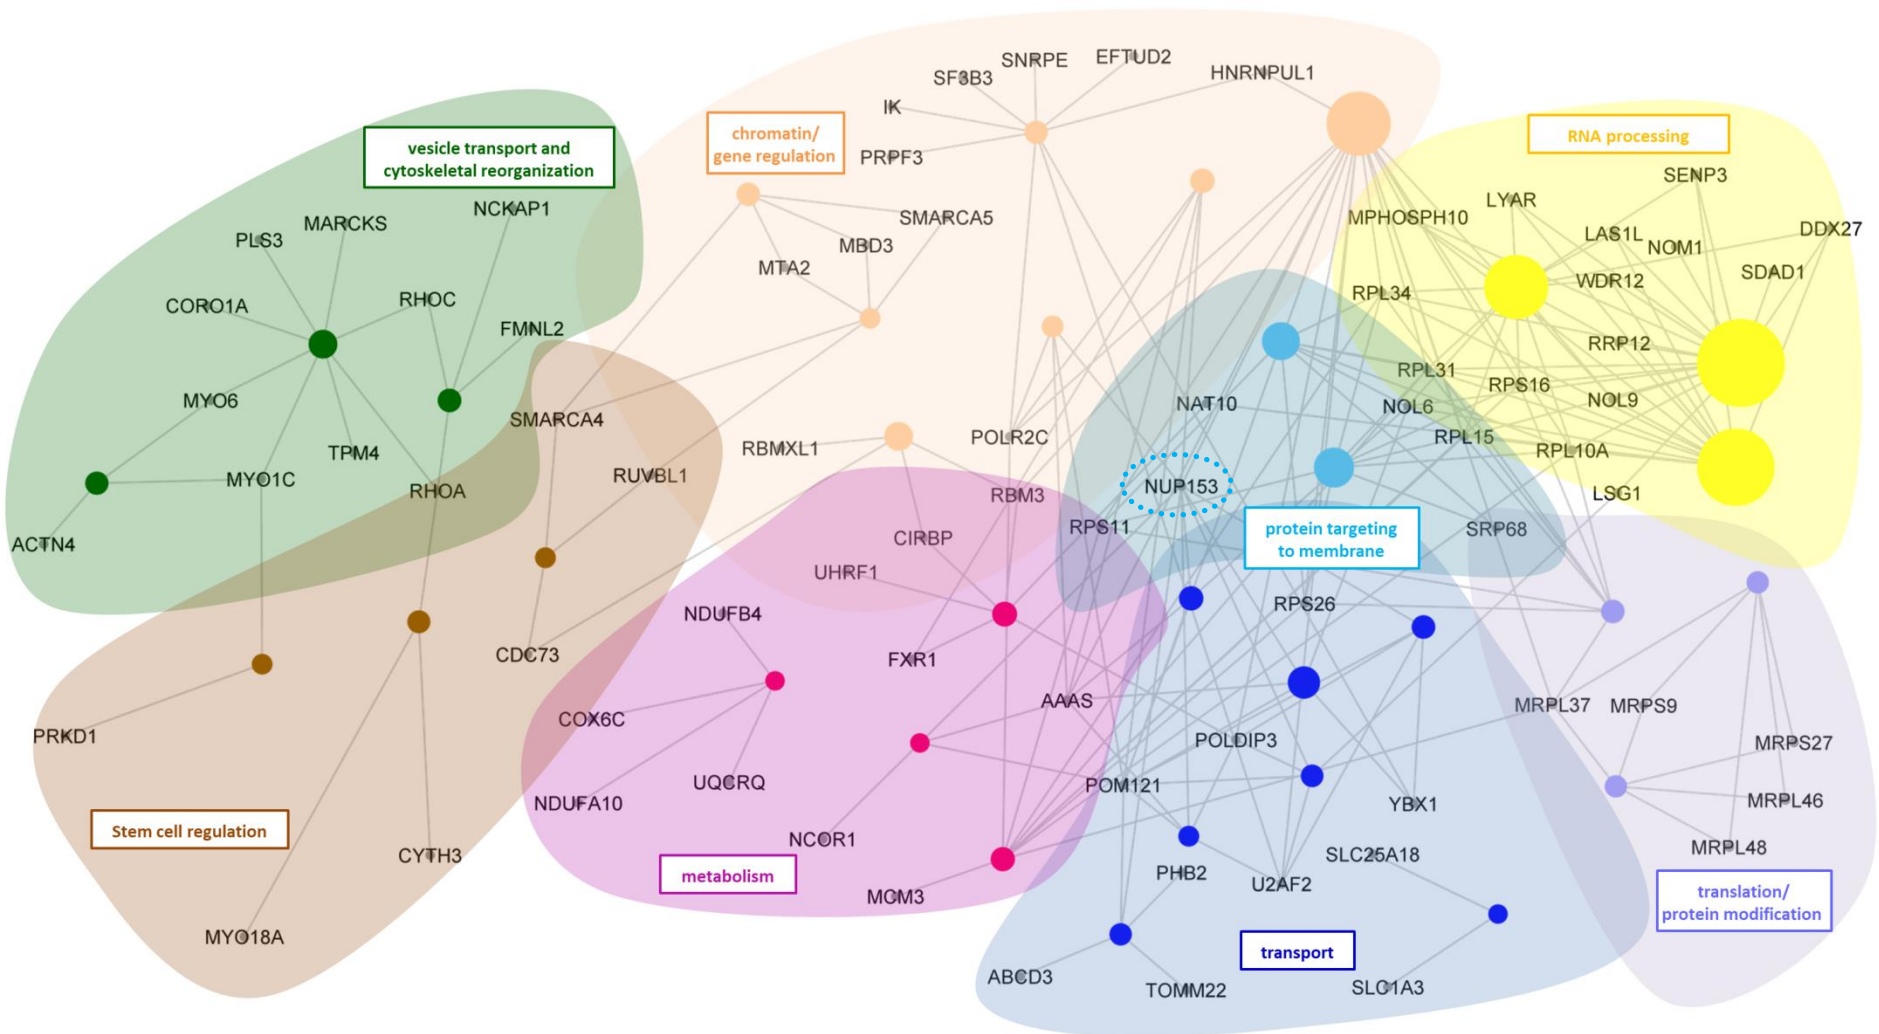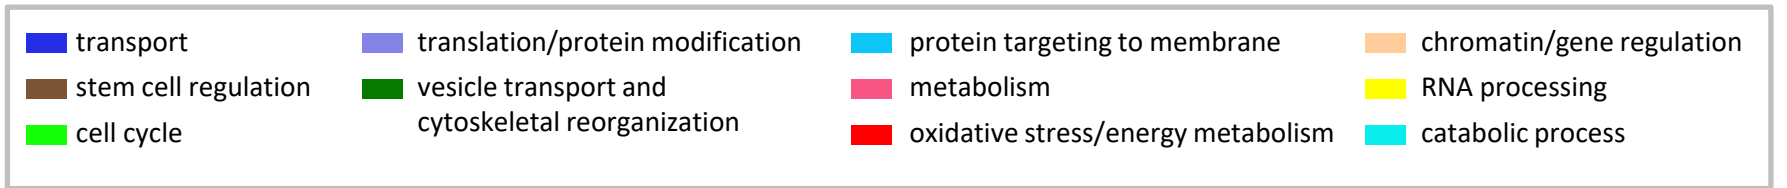

**B**

**AD-specific GO BP**

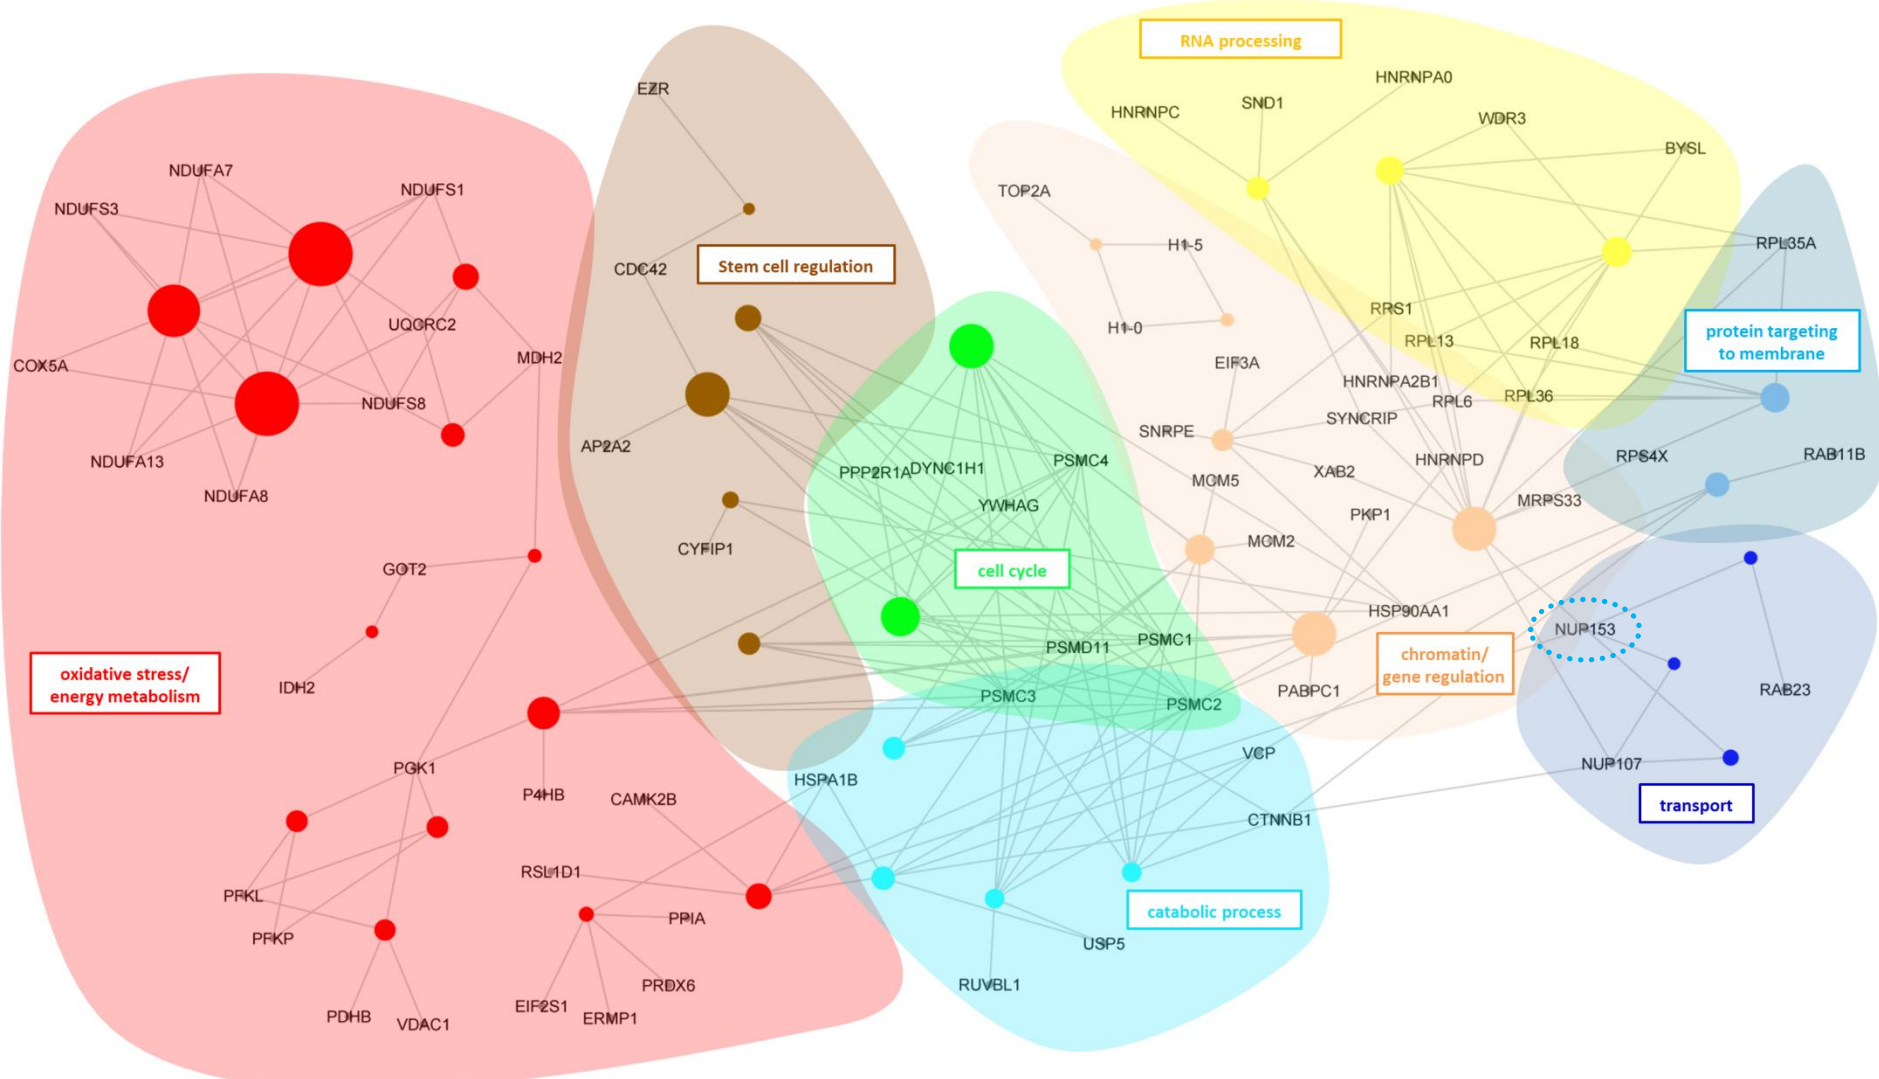

Supplement: 13287_2024_3805_MOESM2_ESM.pdf [file 13287_2024_3805_MOESM2_ESM.pdf]
